# Supplementary material for: Tissue-Specific Sample Dilution: An Important Parameter to Optimise Prior to Untargeted LC-MS Metabolomics
Source: MDPI journal article supplement (doi:10.3390/metabo9070124), 2019-06-27
Supplement: s1 [file s1]

**Table S1:** XCMS settings for peak detection in lipid data and HILIC data obtained from each ionisation mode

|                   | Method   | Ppm | Mzdiff | Peakwidth | Prefilter | Snthresh | Noise |
|-------------------|----------|-----|--------|-----------|-----------|----------|-------|
| <b>Lipid ESI+</b> | centwave | 10  | 0.001  | 5, 30     | 6, 20000  | 20       | 10000 |
| <b>Lipid ESI-</b> | centwave | 10  | 0.001  | 5, 30     | 6, 20000  | 20       | 10000 |
| <b>HILIC ESI+</b> | centwave | 10  | 0.001  | 12, 48    | 3, 2000   | 20       | 1000  |
| <b>HILIC ESI-</b> | centwave | 10  | 0.001  | 12, 48    | 3, 2000   | 20       | 1000  |

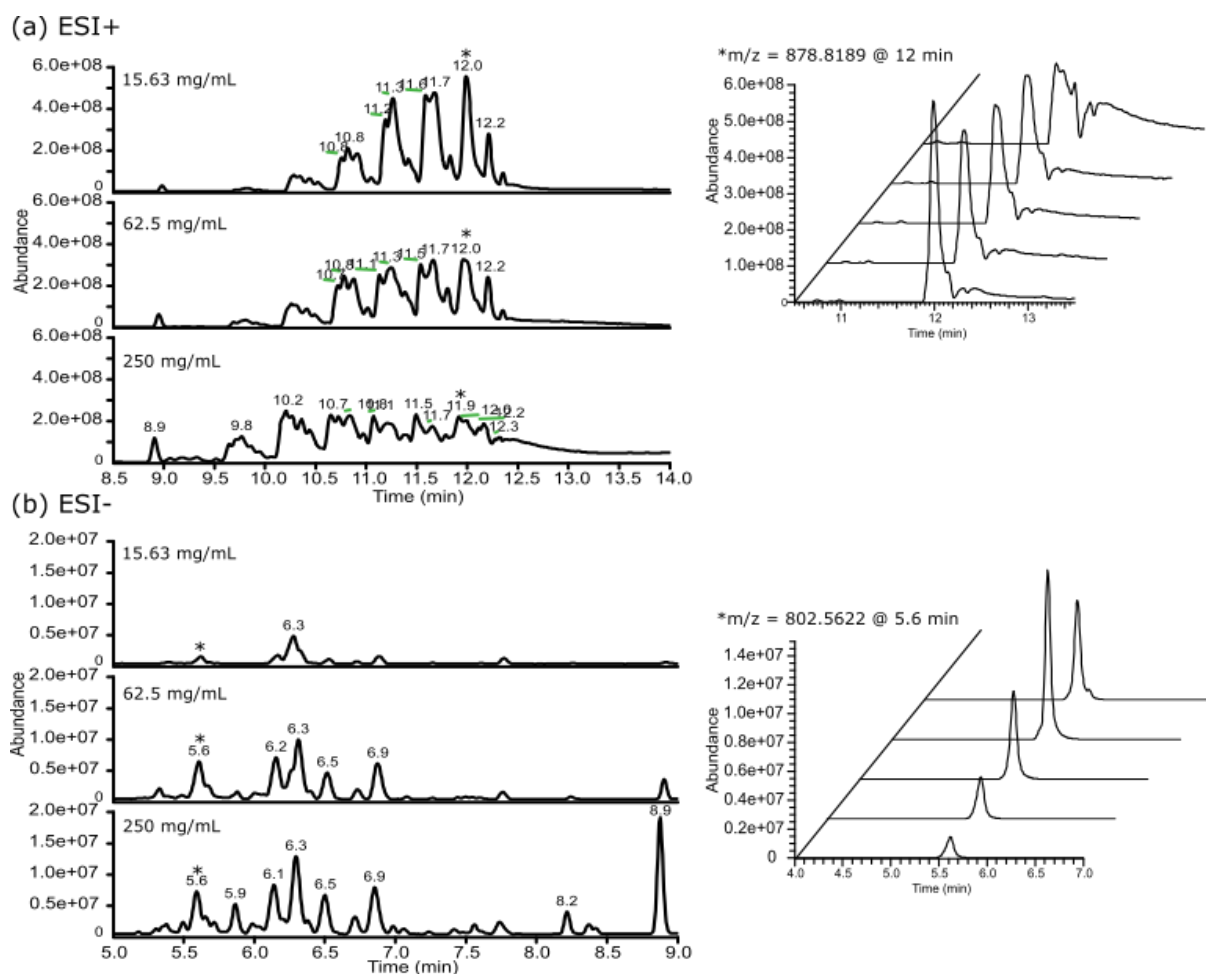

**Figure S1:** Total ion chromatogram (TIC) of lipid extracts from 50 mg adipose tissue at 15.63 mg/ml, 62.5 mg/ml and 250 mg/ml injected concentration and example for problematic extracted ion chromatogram (EIC) at this concentration range analysed by (a) ESI+ eluted between 8.5-14 min and (b) ESI- eluted between 5-9 min, on a fixed scale of absolute intensity. The EIC along the z-axis starts from the lowest injected concentration (15.63 mg/ml) at the front towards the highest concentration (250 mg/ml) at the back. The selected features for EIC examination were marked as \* in the corresponding TIC.

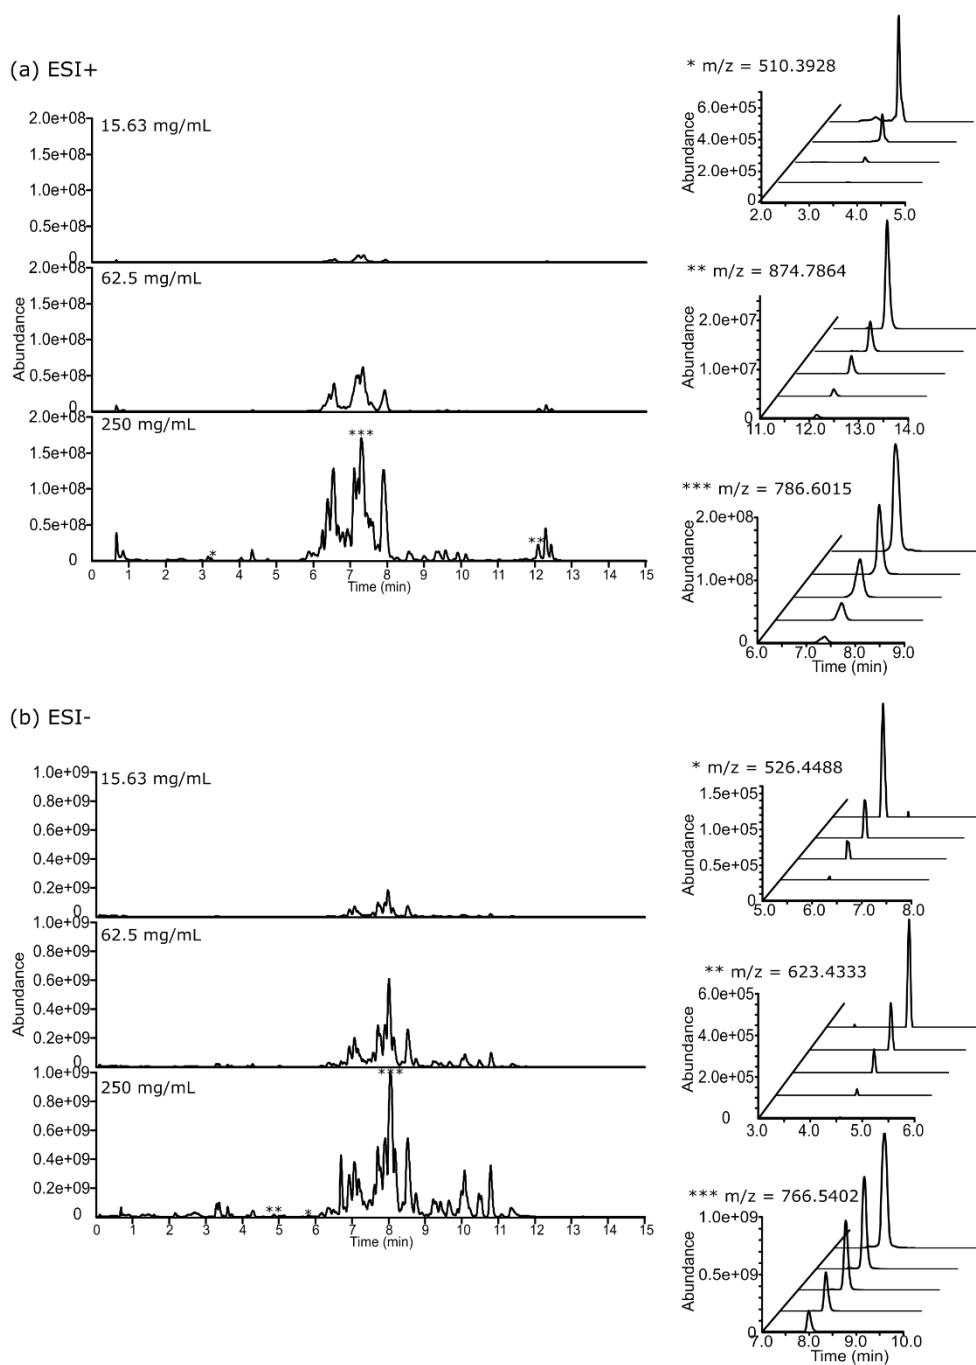

**Figure S2:** Total ion chromatogram (TIC) of lipid extracts from liver at low (15.63 mg/ml), intermediate (62.5 mg/ml) and high (250 mg/ml) injected concentration analysed by (a) ESI+ and (b) ESI-, and selected EIC of small (\*), medium (\*\*) and large (\*\*\*) peaks representative of low, medium and high abundance features respectively on a fixed scale of absolute intensity to evaluate peak shape and the concentration-dependent response. The EIC along the z-axis starts from the lowest injected concentration at the front towards the highest concentration at the back.

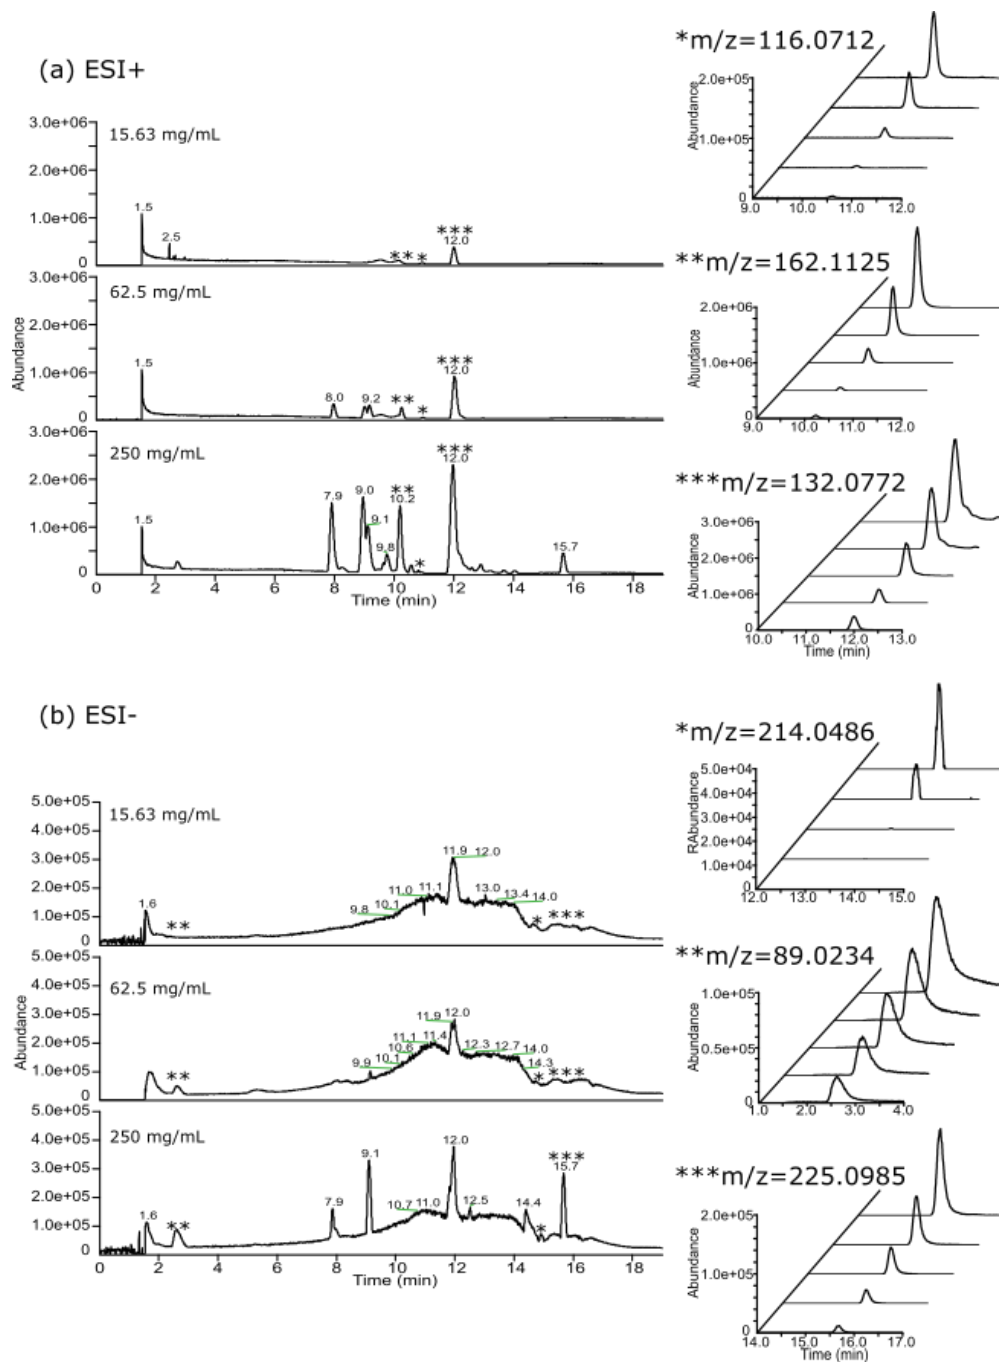

**Figure S3:** Total ion chromatogram (TIC) of polar extracts from adipose tissue at low (15.63 mg/ml), intermediate (62.5 mg/ml) and high (250 mg/ml) injected concentration analysed by (a) ESI+ and (b) ESI-, and selected EIC of small (\*), medium (\*\*) and large (\*\*\*) peaks representative of low, medium and high abundance features respectively on a fixed scale of absolute intensity to evaluate peak shape and the concentration-dependent response. The EIC along the z-axis starts from the lowest injected concentration at the front towards the highest concentration at the back.

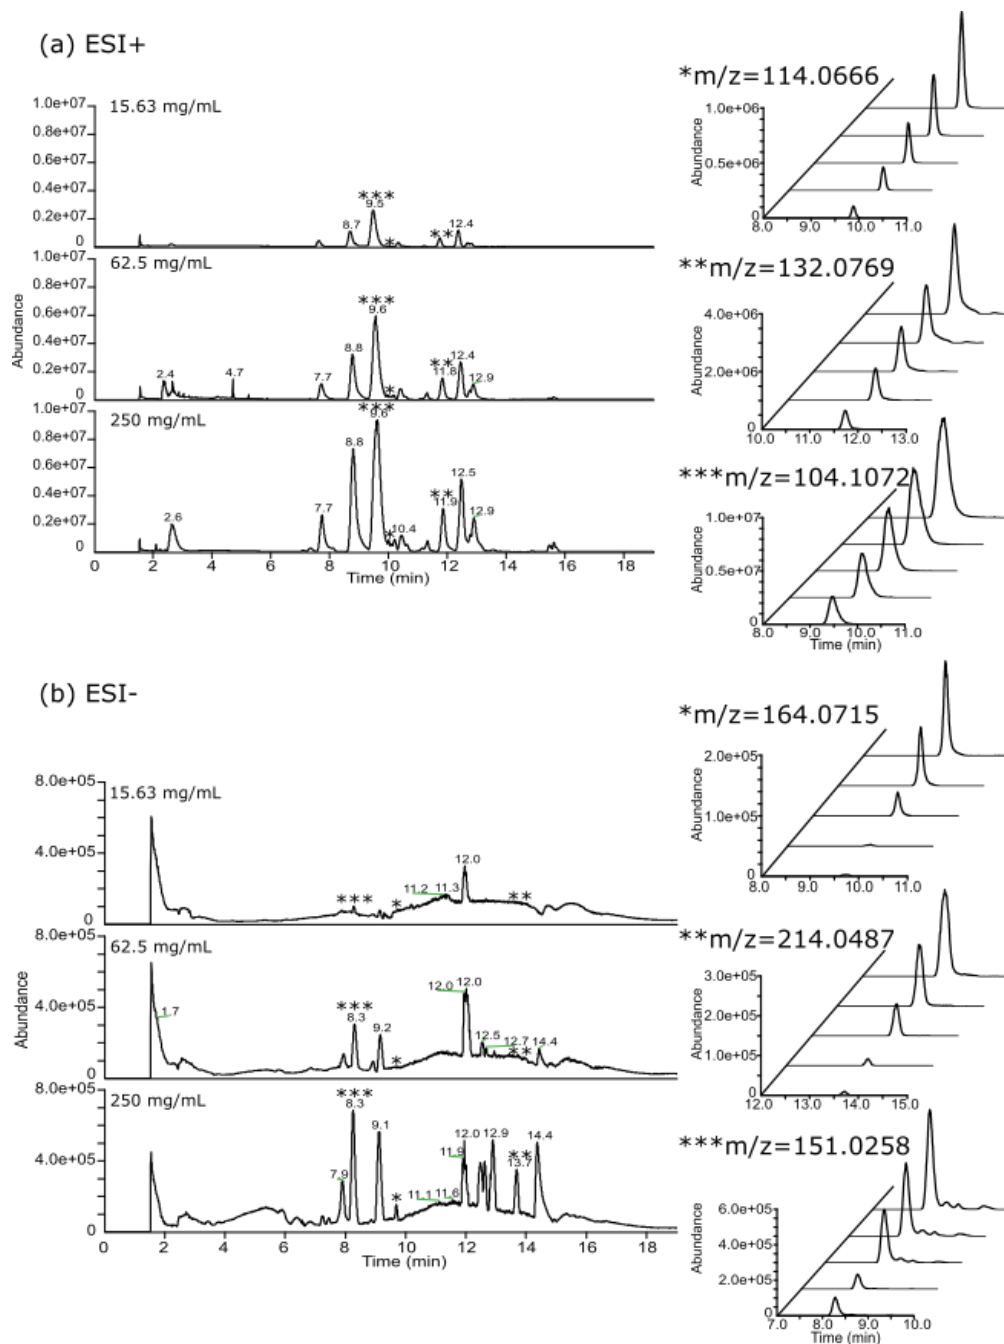

**Figure S4:** Total ion chromatogram (TIC) of polar extracts from liver at low (15.63 mg/ml), intermediate (62.5 mg/ml) and high (250 mg/ml) injected concentration analysed by (a) ESI+ and (b) ESI-, and selected EIC of small (\*), medium (\*\*) and large (\*\*\*) peaks representative of low, medium and high abundance features respectively on a fixed scale of absolute intensity to evaluate peak shape and the concentration-dependent response. The EIC along the z-axis starts from the lowest injected concentration at the front towards the highest concentration at the back.
